# Supplementary material for: Highly efficient heterojunction solar cells enabled by edge-modified tellurene nanoribbons
Source: Royal Society of Chemistry journal article supplement (doi:10.1039/d0cp04973e), 2020-01-01
Supplement: d0cp04973e1.pdf [file d0cp04973e1.pdf]

**Supporting Information**  
**Highly efficient heterojunction solar cells enabled by edge-modified tellurene nanoribbons**

Yunzhi Gao,<sup>1</sup> Kai Wu,<sup>1</sup> Wei Hu,<sup>1,\*</sup> and Jinlong Yang<sup>1,†</sup>

*<sup>1</sup>Hefei National Laboratory for Physical Sciences at the Microscale, Department of Chemical Physics,  
and Synergetic Innovation Center of Quantum Information and Quantum Physics,  
University of Science and Technology of China, Hefei, Anhui 230026, China*

---

\*E-mail: whuustc@ustc.edu.cn

†E-mail: jlyang@ustc.edu.cn

TABLE S1: The calculated energy difference  $\Delta E$  between HE-ZTNR and TE-ZTNR (meV per atom).

| Width of ZTNR | $\Delta E$ |
|---------------|------------|
| 4             | 7.11       |
| 5             | 7.19       |
| 6             | 6.70       |
| 7             | 4.56       |
| 8             | 5.32       |
| 9             | 5.80       |
| 10            | 3.02       |
| 11            | 3.78       |

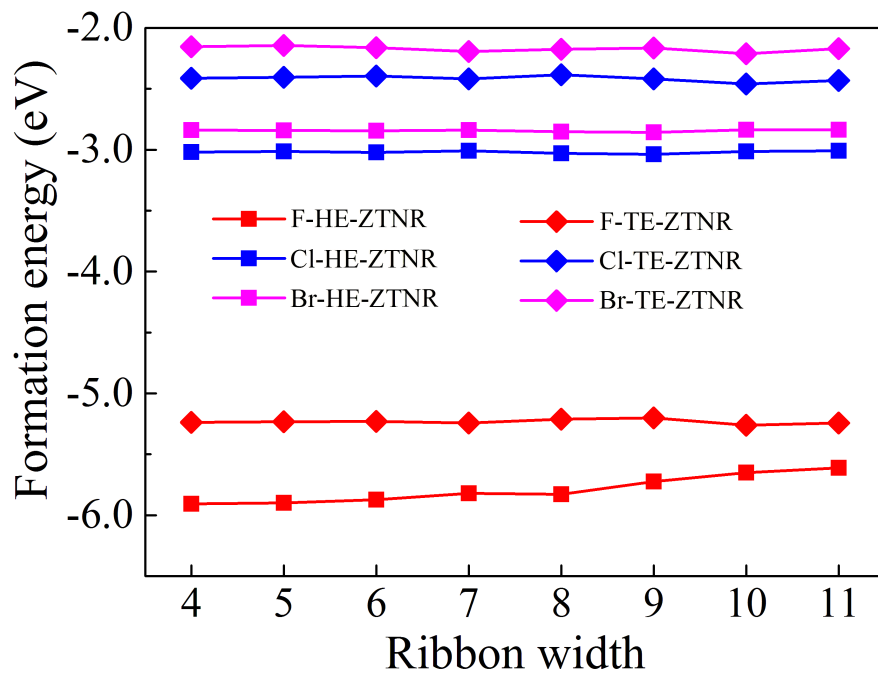

FIG. S1: The calculated formation energy of edge-modified ZTNRs as a function of the ribbon width.

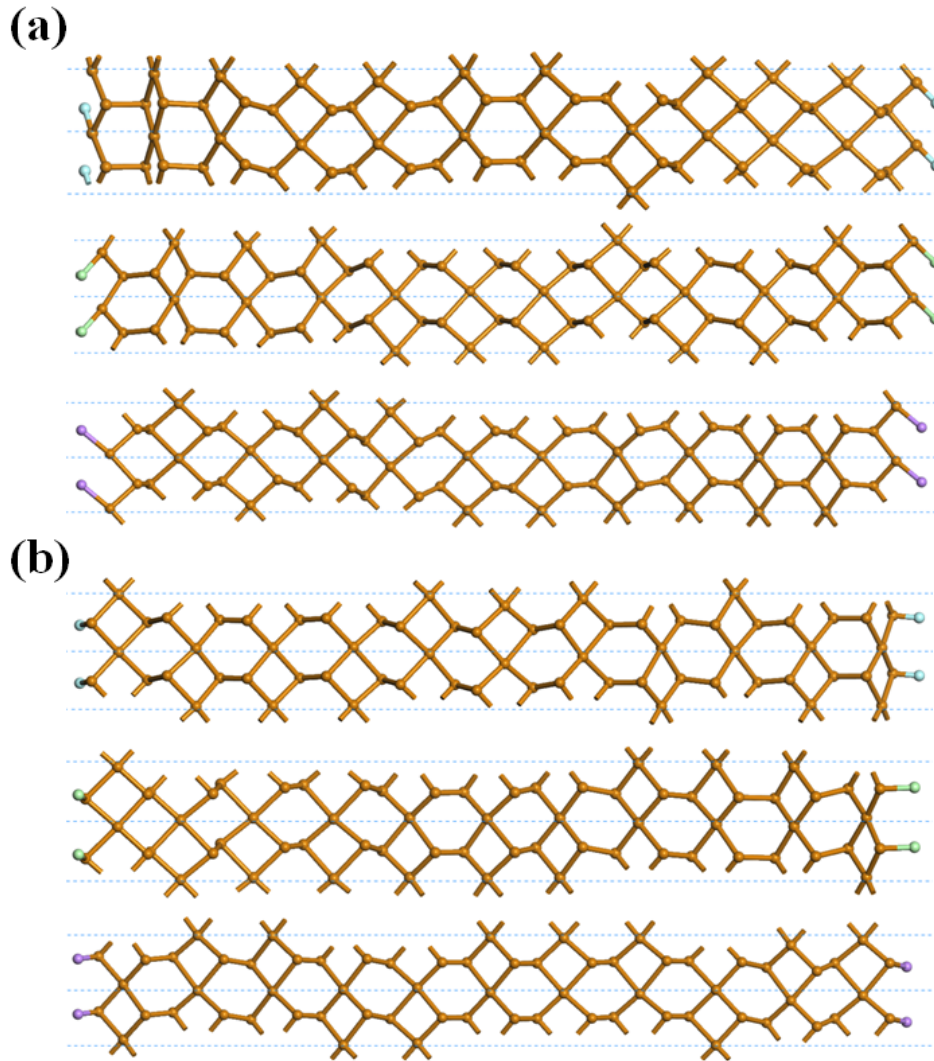

FIG. S2: AIMD simulations of X-ZTNR-11 ( $X = \text{H, F, Cl}$  and  $\text{Br}$ ). Atomic structures of (a) X-HE-ZTNR-11 and (b) X-TE-ZTNR-11 after AIMD fluctuations for 10.0 ps at  $T = 300$  K. The orange, white, cyan, light green and purple balls denote tellurium, hydrogen, fluorine, chlorine and bromine atoms, respectively.

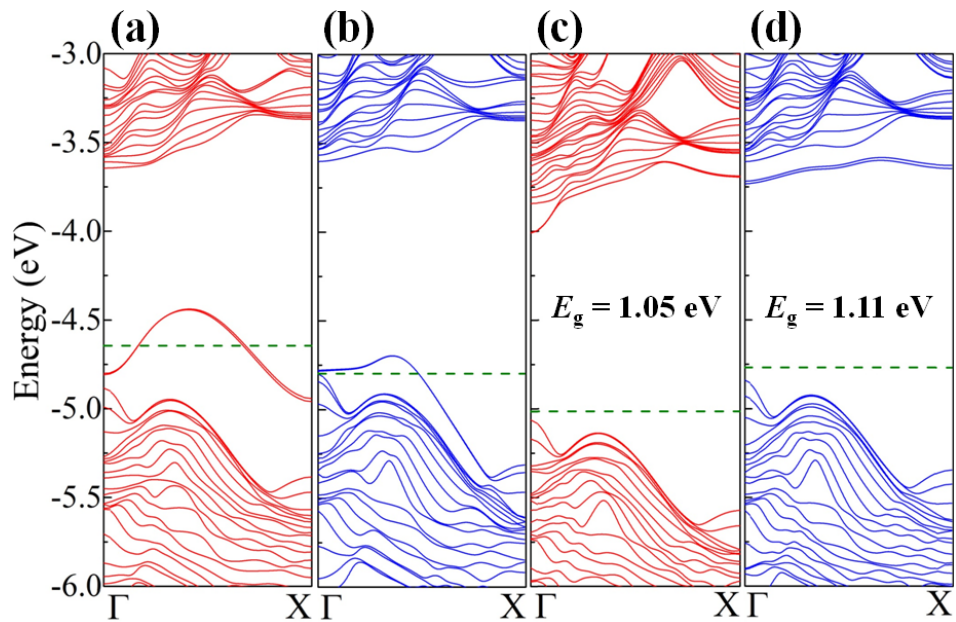

FIG. S3: The band structures of (a) HE-ZTNR-10, (b) TE-ZTNR-10, (c) Br-HE-ZTNR-10 and (d) Br-TE-ZTNR-10 calculated by PBE functional. HE-ZTNR-10 and TE-ZTNR-10 show like metal. The band gaps  $E_g$  of Br-HE-ZTNR-10 and Br-TE-ZTNR-10 are marked in each diagram. The green dash lines denote fermi energy level. The vacuum energy level is set to zero.

TABLE S2: The calculated binding energy  $E_b$  (meV per atom) and equilibrium distance  $D$  (Å) of ZTNRs heterobilayers and bilayer tellurene for comparison.

| Heterobilayer     | $E_b$ | $D$  |
|-------------------|-------|------|
| F/Cl-HE-ZTNRs-11  | -78.2 | 2.38 |
| F/Br-HE-ZTNRs-11  | -80.1 | 2.32 |
| Cl/Br-HE-ZTNRs-11 | -74.6 | 2.40 |
| F/Cl-TE-ZTNRs-11  | -74.4 | 2.41 |
| F/Br-TE-ZTNRs-11  | -75.3 | 2.39 |
| Cl/Br-TE-ZTNRs-11 | -75.2 | 2.38 |
| Bilayer tellurene | -75.0 | 2.43 |

TABLE S3: Power conversion efficiency (PCE) of our proposed heterojunction solar cells based on ZTNRs with width varying from 9 to 10. Relative properties are also listed, including band gap of donor semiconductor  $E_d$  (eV) and conduction band offset  $\Delta E_c$  (eV).

| ZTNRs Heterobilayer | $E_d$ | $\Delta E_c$ | PCE (%) |
|---------------------|-------|--------------|---------|
| F/Cl-HE-ZTNRs-9     | 1.49  | 0.264        | 17.9    |
| F/Br-HE-ZTNRs-9     | 1.49  | 0.197        | 19.1    |
| Cl/Br-HE-ZTNRs-9    | 1.40  | 0.067        | 21.6    |
| F/Cl-HE-ZTNRs-10    | 1.48  | 0.235        | 18.5    |
| F/Br-HE-ZTNRs-10    | 1.48  | 0.157        | 19.8    |
| Cl/Br-HE-ZTNRs-10   | 1.39  | 0.077        | 21.4    |
| F/Cl-TE-ZTNRs-9     | 1.47  | 0.056        | 21.6    |
| F/Br-TE-ZTNRs-9     | 1.47  | 0.093        | 20.8    |
| Cl/Br-TE-ZTNRs-9    | 1.47  | 0.038        | 22.0    |
| F/Cl-TE-ZTNRs-10    | 1.44  | 0.066        | 21.5    |
| F/Br-TE-ZTNRs-10    | 1.44  | 0.880        | 21.1    |
| Cl/Br-TE-ZTNRs-10   | 1.44  | 0.021        | 22.5    |
